# Supplementary material for: Flotation Assembly of Large-Area Ultrathin MWCNT Nanofilms for Construction of Bioelectrodes
Source: MDPI journal article supplement (doi:10.3390/nano7100342), 2017-10-21
Supplement: s1 [file s1]

## Flotation Assembly of Large-Area Ultrathin MWCNT Nanofilms for Construction of Bioelectrodes

Andrew J. Gross <sup>1,2</sup>, Jules L. Hammond <sup>1</sup>, Michael Holzinger <sup>1</sup> and Serge Cosnier <sup>1,\*</sup>

<sup>1</sup> Department of Molecular Chemistry, UMR CNRS-UGA 5250, Université Grenoble Alpes, 38000 Grenoble, France; andrew.gross@univ-grenoble-alpes.fr (A.J.G.); jules.hammond@univ-grenoble-alpes.fr (J.L.H.); michael.holzinger@univ-grenoble-alpes.fr (M.H.)

<sup>2</sup> Université Grenoble Alpes, CERMAV, 38000 Grenoble, France

\* Correspondence: serge.cosnier@univ-grenoble-alpes.fr; Tel.: +33-4-56-52-08-10

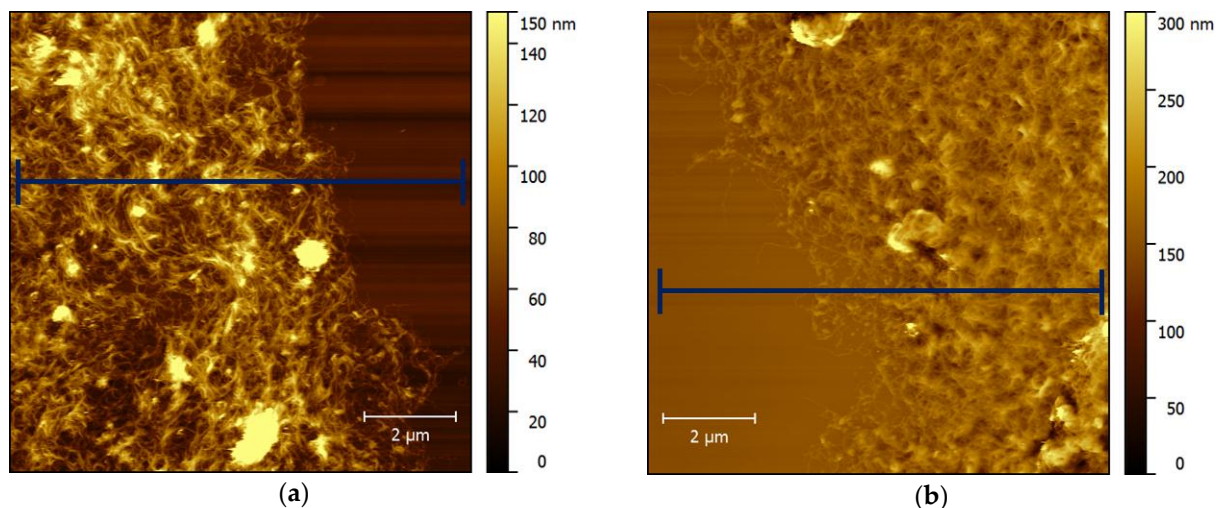

**Figure S1.** Atomic force microscopy topographic images ( $10.0\ \mu\text{m} \times 10.0\ \mu\text{m}$ ) for depth profiling recorded at (a) thin and (b); blue markers indicate the  $1.0\ \mu\text{m} \times 9.5\ \mu\text{m}$  cross-sections corresponding to the average line plots in Figure 2c and Figure 2d.

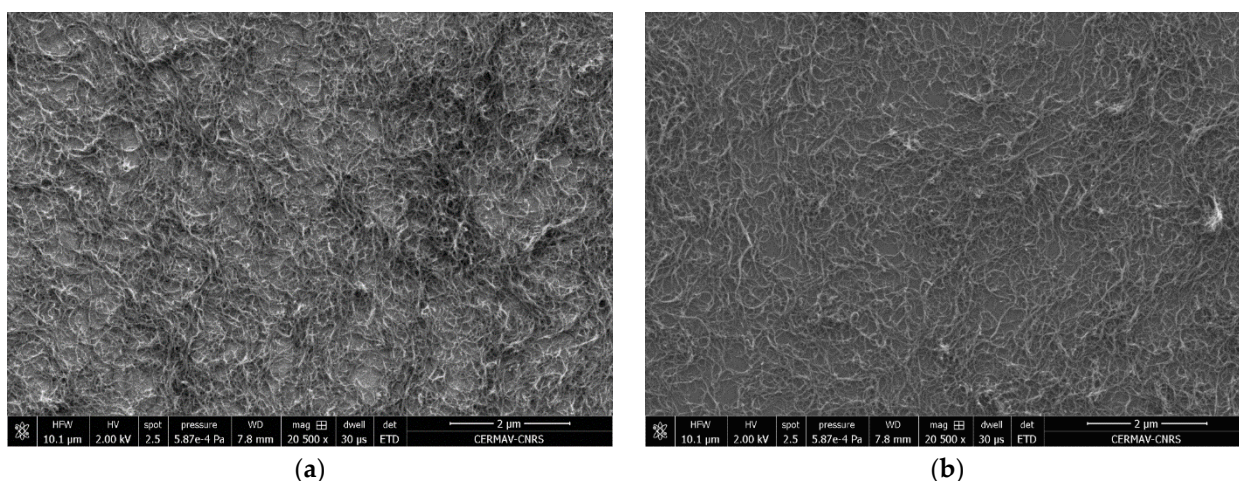

**Figure S2.** Scanning electron microscopy images showing (a) thin MWCNTs transferred to a Au substrate; (b) thin MWCNTs transferred to a Si substrate.

## Supplementary Information

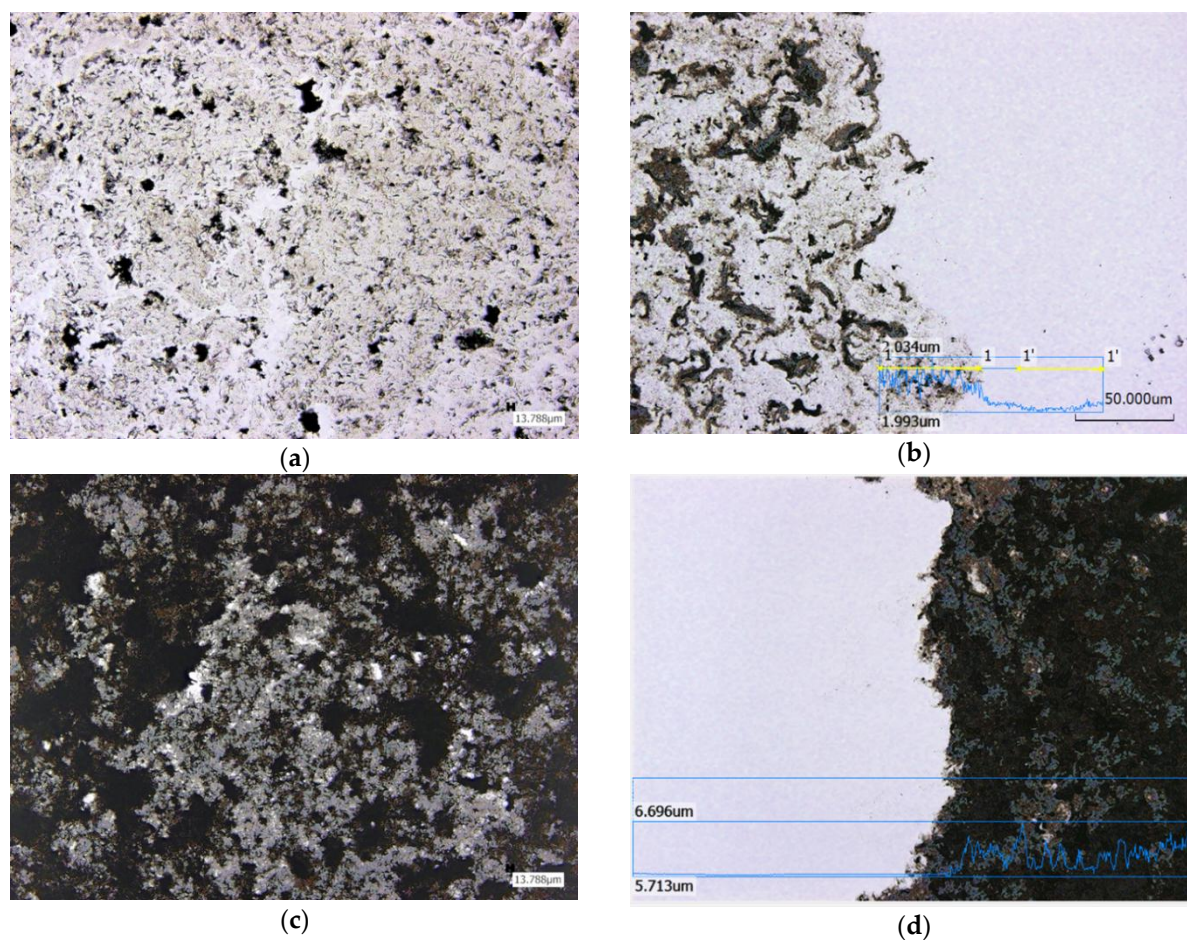

**Figure S3.** Confocal laser images of (a,b) thin MWCNTs transferred to a Si substrate: (a) typical central area and (b) edge boundary with height measurement; (c,d) thick MWCNTs transferred to a Si substrate: (c) typical central area and (d) edge boundary with height measurement.

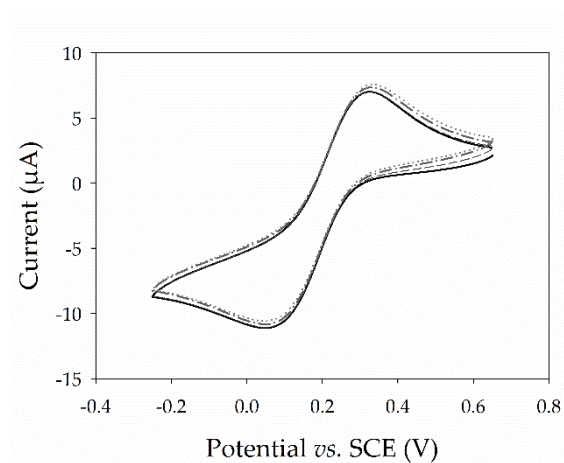

**Figure S4.** Cyclic voltammograms recorded at thin MWCNT on Pt in 1 mM  $\text{K}_3\text{Fe}(\text{CN})_6^{3-}$  in 0.1 M PB pH 7 with 0.1 M KCl as supporting electrolyte showing 1st, 2nd, 10th and 20th (solid, dash, dash-dot and dot, respectively) cycles.



## Supplementary Information

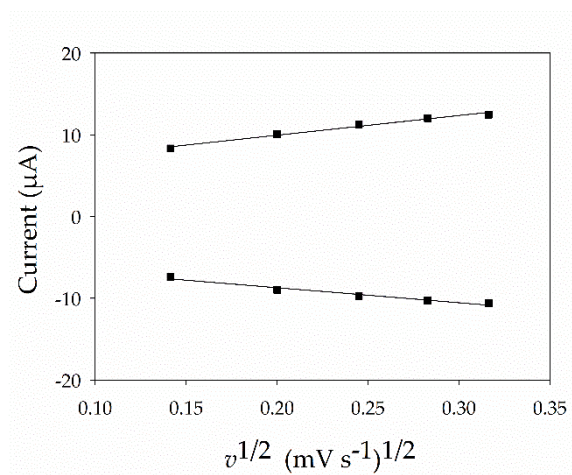

**Figure S5.** Linear dependence ( $R^2 = 0.980$ ) of peak current versus scan rate for the anodic and cathodic peaks at thin MWCNT on Pt in 1 mM  $\text{K}_3\text{Fe}(\text{CN})_6^{3-}$  in 0.1 M PB pH 7 with 0.1 M KCl.
